# Supplementary figures and images for: NCL Inhibition Exerts Antineoplastic Effects against Prostate Cancer Cells by Modulating Oncogenic MicroRNAs
Source: MDPI journal article supplement (doi:10.3390/cancers12071861), 2020-07-10

Fig 2A - NCL

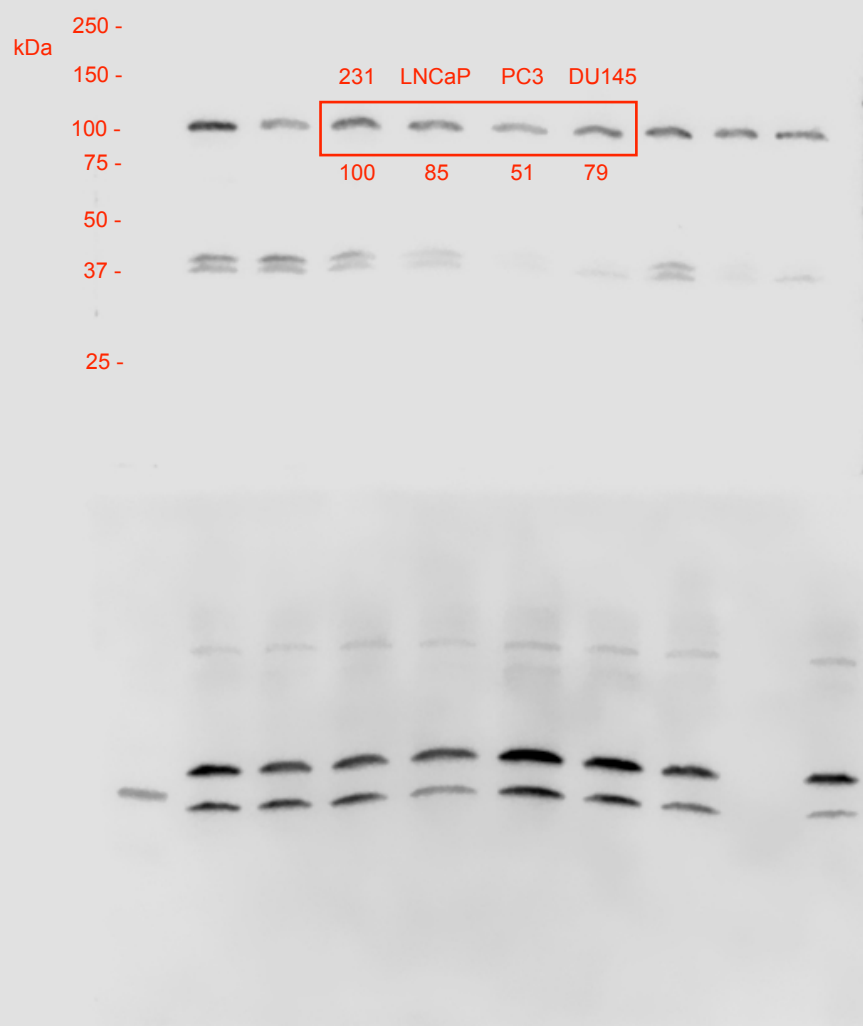

Fig 2A - NCL - ladder

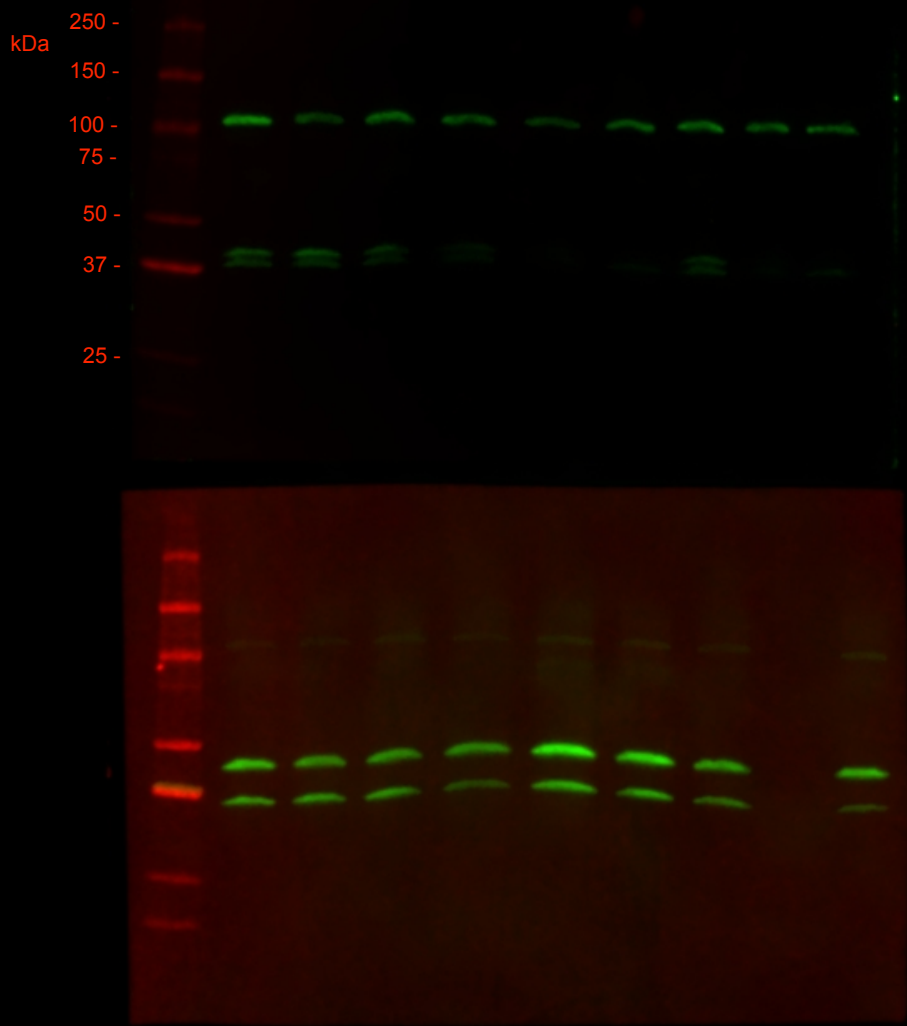

I

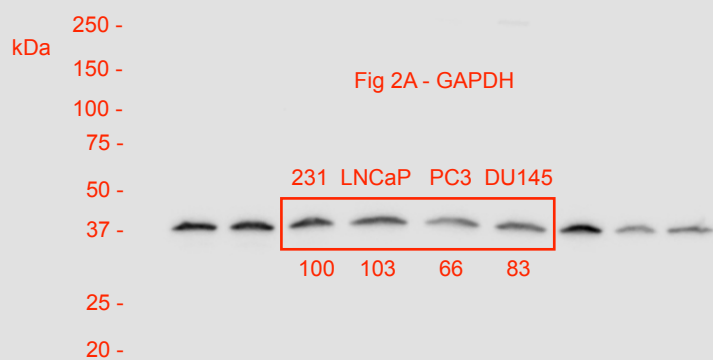

II

Fig 2A - GAPDH - ladder

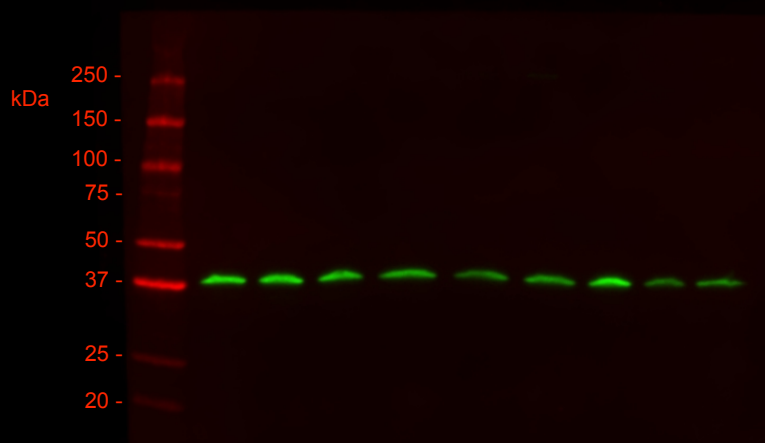

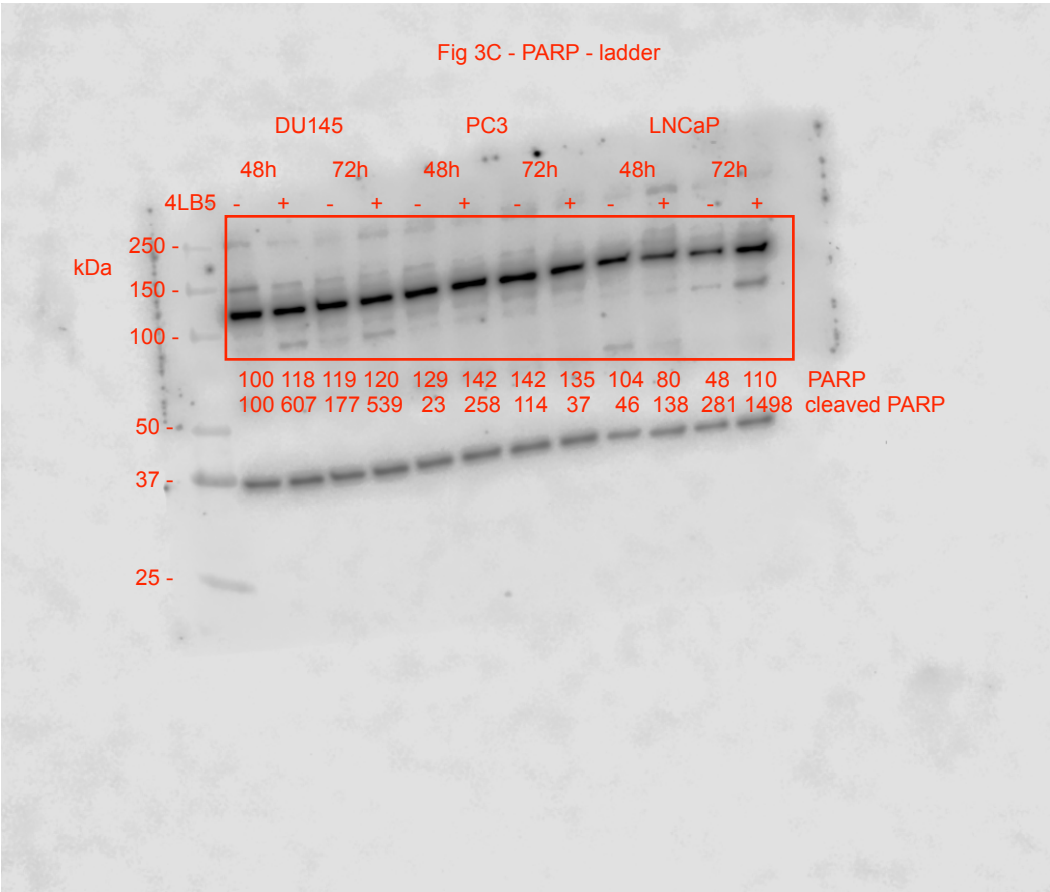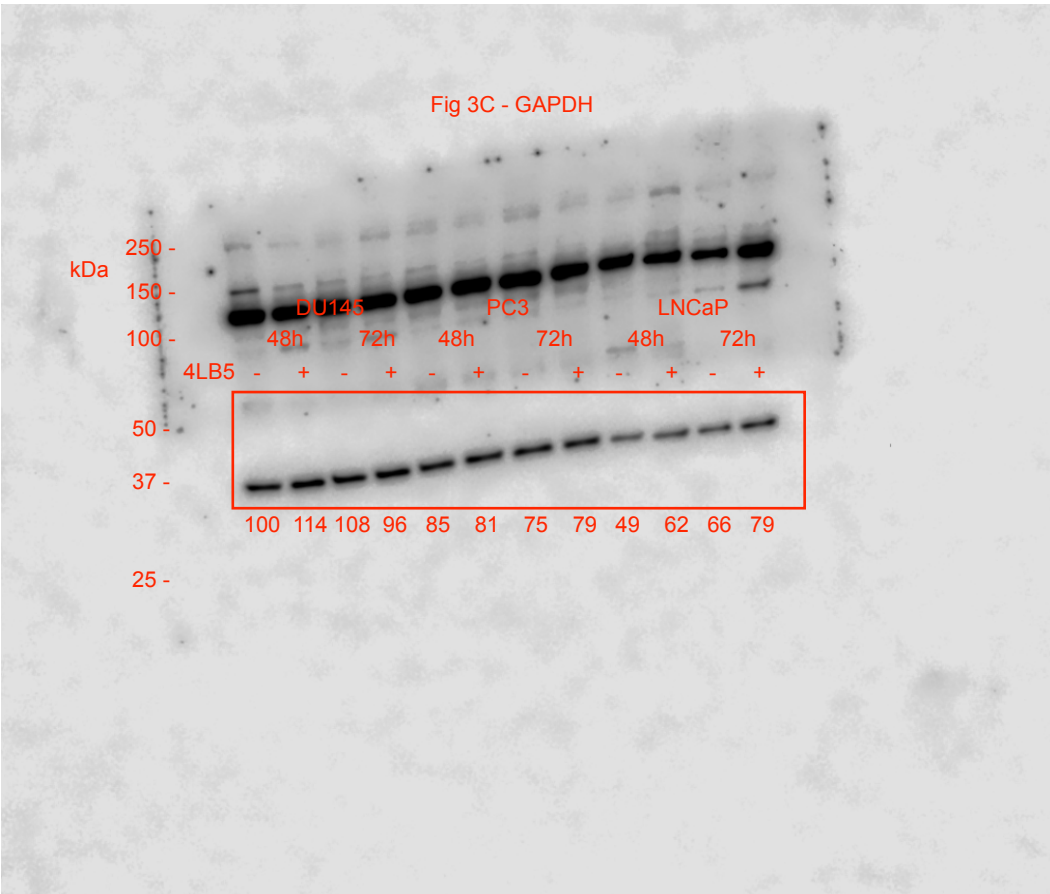



Fig 5A - AR

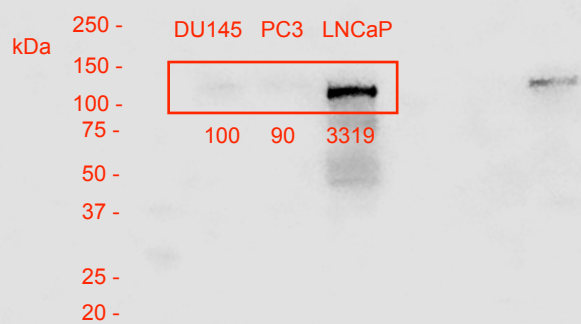

Fig 5A - AR - ladder

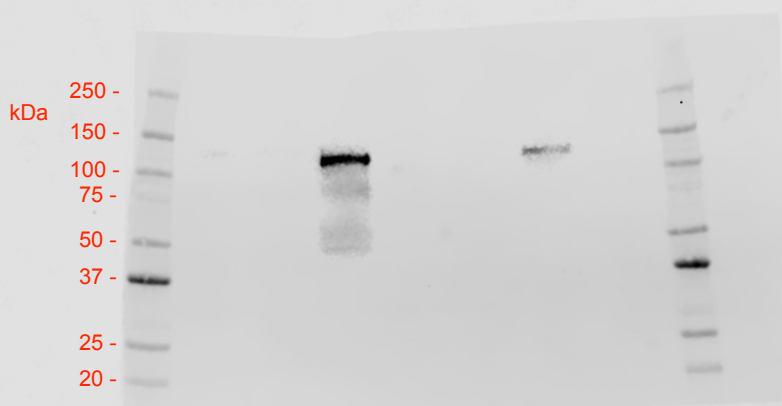

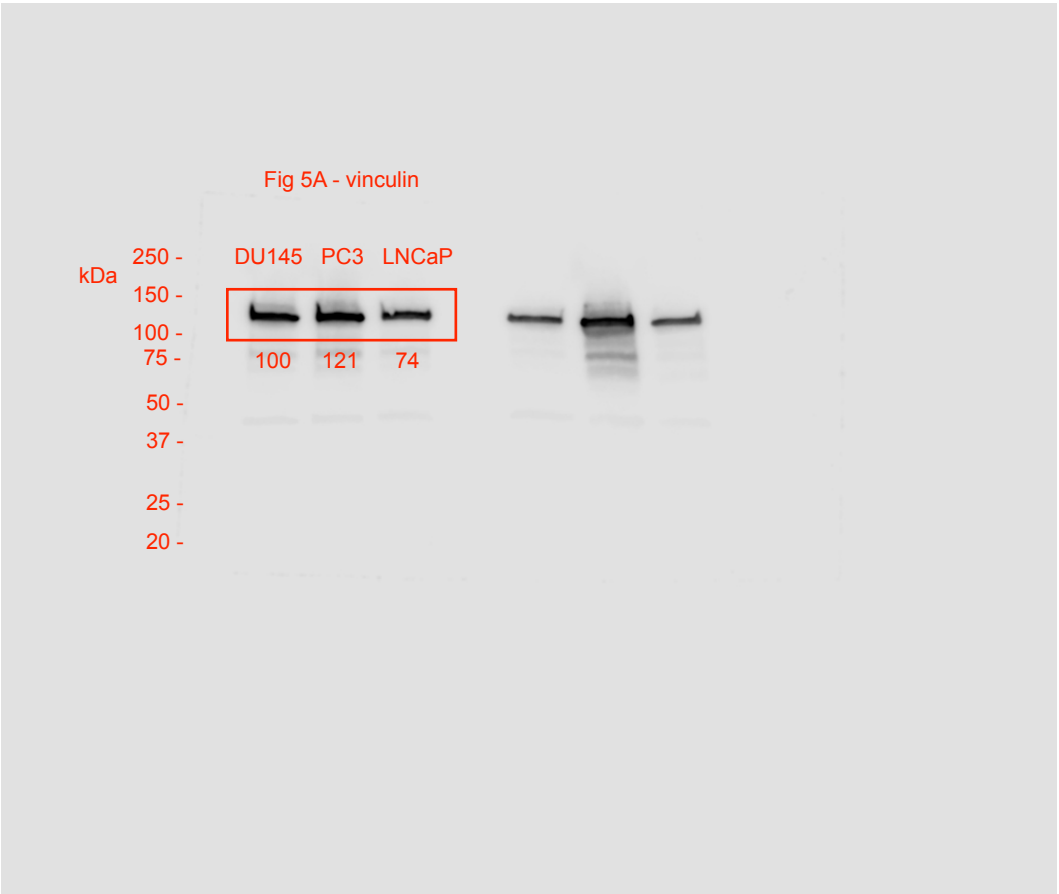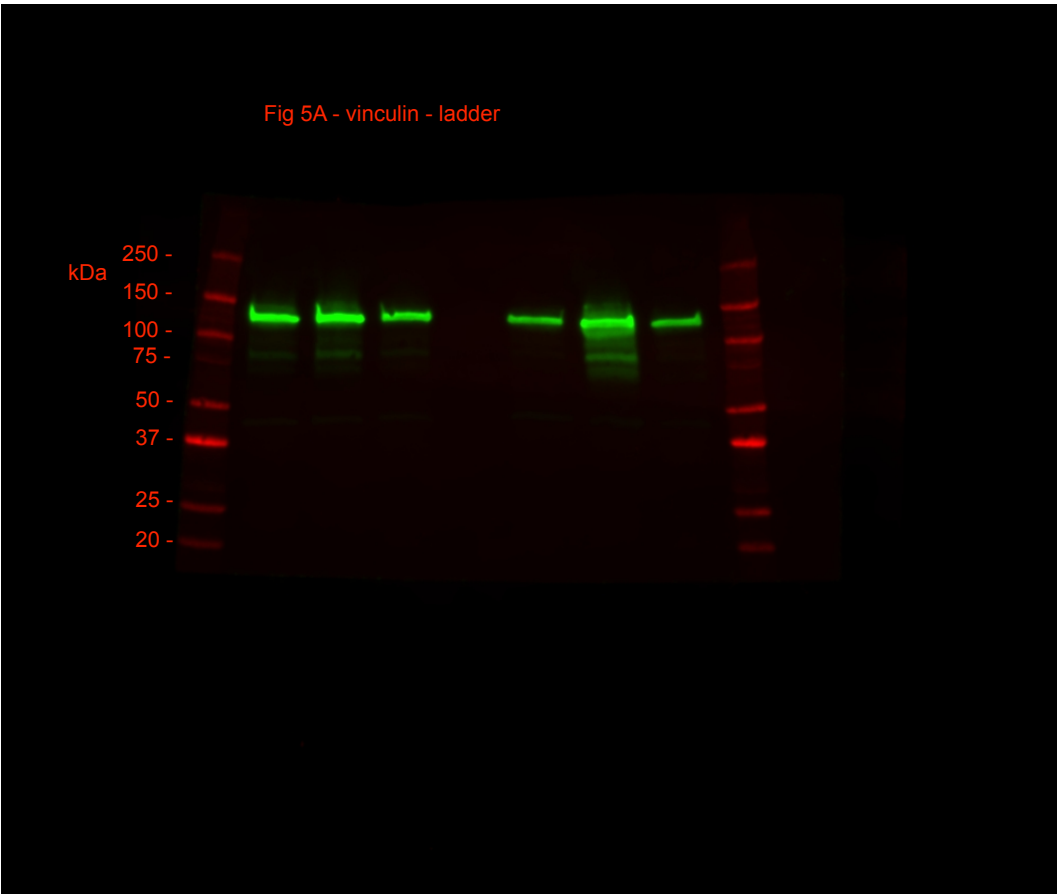

Fig 5B - AR

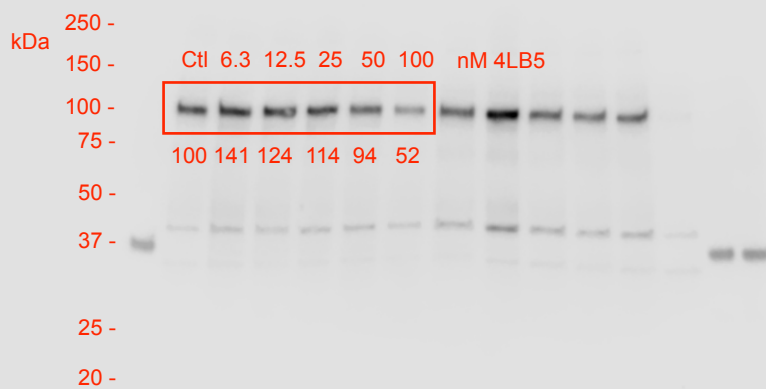

Fig 5B - AR - ladder

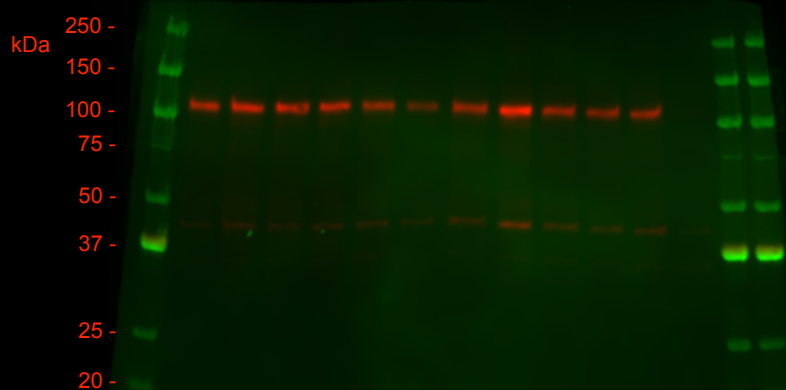

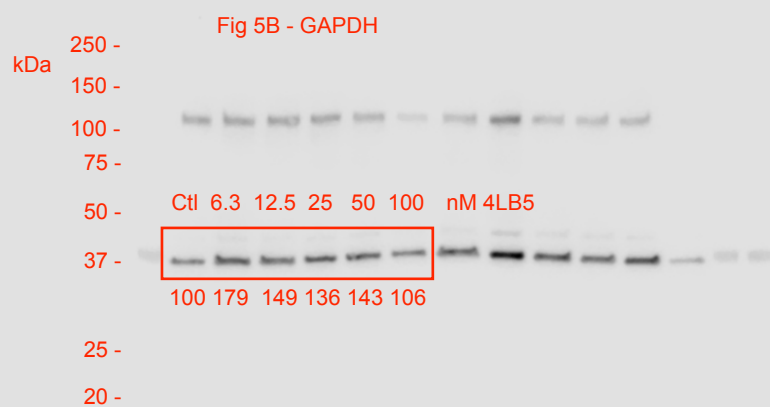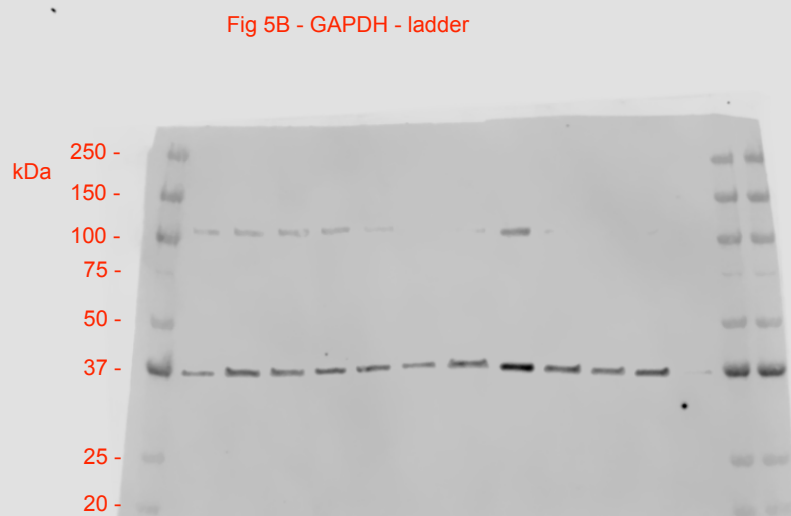

Supplement: s1 [file s1]
